# Supplementary material for: Immuno-Contexture and Immune Checkpoint Molecule Expression in Microsatellite Stable/Mismatch Repair Proficient Colorectal Carcinoma
Source: Preprints.org preprint supplement (doi:10.20944/preprints202305.0526.v1), 2023-05-08
Supplement: Supplementary file 1 [file supplementary]

**Supplementary Table S1. List of antibodies used for IHC staining.**

| Antibody | Clone | Dilution | Source |
| --- | --- | --- | --- |
| TCR delta | H-14 | 1:50 | Santa Cruz Biotechnology, Santa Cruz, CA, USA |
| CD3 | LN10 | 1:70 | Leica Biosystems, Wetzlar, Germany |
| CD4 | 4B12 | 1:50 | Leica Biosystems |
| CD8 | C8/144B | 1:50 | Agilent Technologies, Santa Clara, CA, USA |
| CD163 | 10D6 | 1:50 | Diagnostic BioSystems, Pleasanton, CA, USA |
| PD-L1 | 22C3 | 1:40 | Roche, Basel, Switzerland |
| TREM2 | D8I4C | 1:100 | Cell Signaling Technology, Danvers, MA, USA |
