# Supplementary material for: Immuno-Contexture and Immune Checkpoint Molecule Expression in Microsatellite Stable/Mismatch Repair Proficient Colorectal Carcinoma
Source: Preprints.org preprint supplement (doi:10.20944/preprints202305.0526.v1), 2023-05-08
Supplement: Supplementary file 2 [file supplementary]

Archive with 2 entries (2 files):
- Giacomelli et al. Supplementary Figures.pdf
- Giacomelli et al. Supplementary Table S1.docx
